# Supplementary material for: 1,2,4,5-Dioxadiazine-functionalized [N–NO2]− furazan energetic salts
Source: Royal Society of Chemistry journal article supplement (doi:10.1039/c6dt02993k), 2016-01-01
Supplement: c6dt02993k1.pdf [file c6dt02993k1.pdf]

## 1. NMR Spectrum of the prepared energetic salts

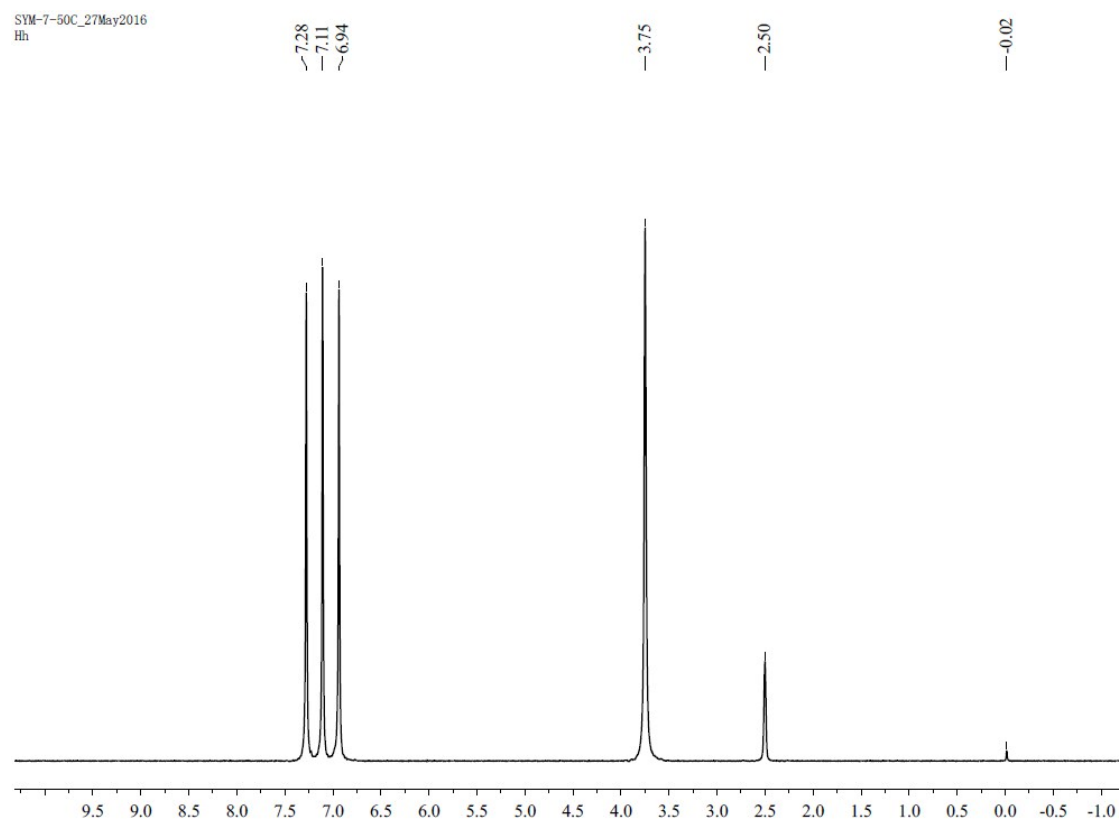

Figure S1. <sup>1</sup>H NMR spectrum of diammonium BNOA (6)

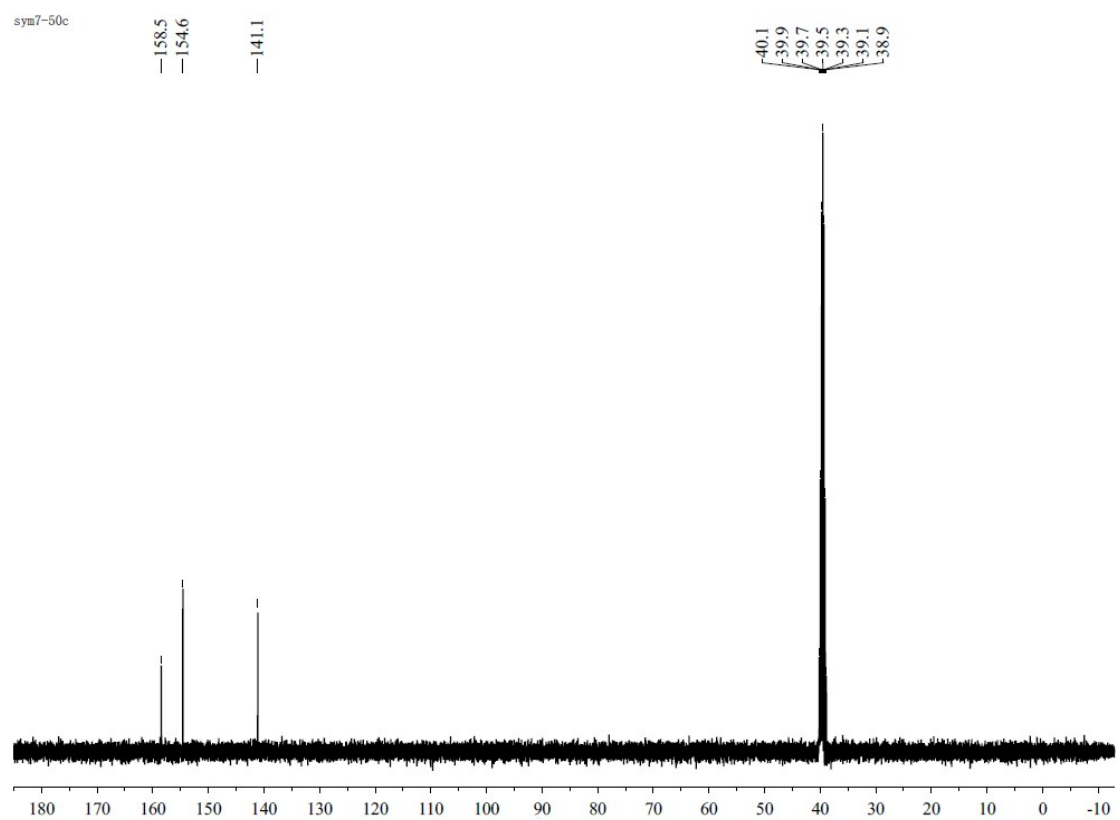

Figure S2.  $^{13}\text{C}$  NMR spectrum of diammonium BNOA (6)

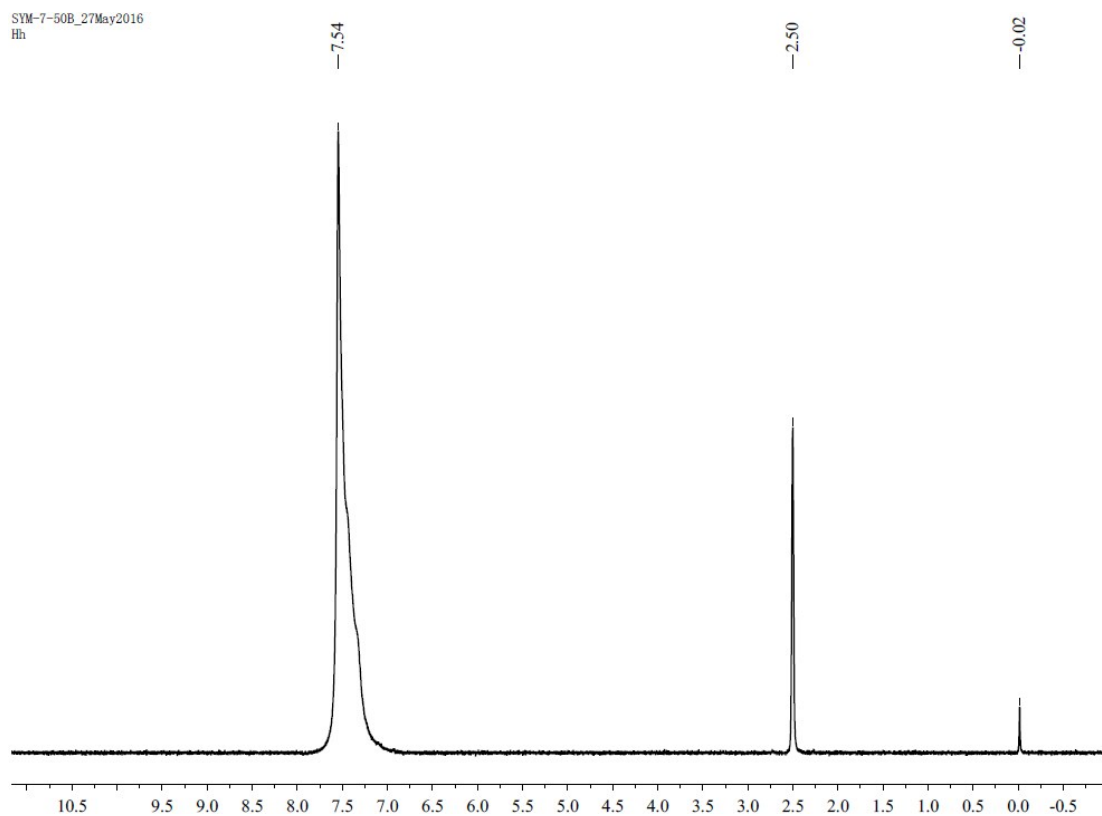

Figure S3.  $^1\text{H}$  NMR spectrum of dihydrazinium BNOA (7)

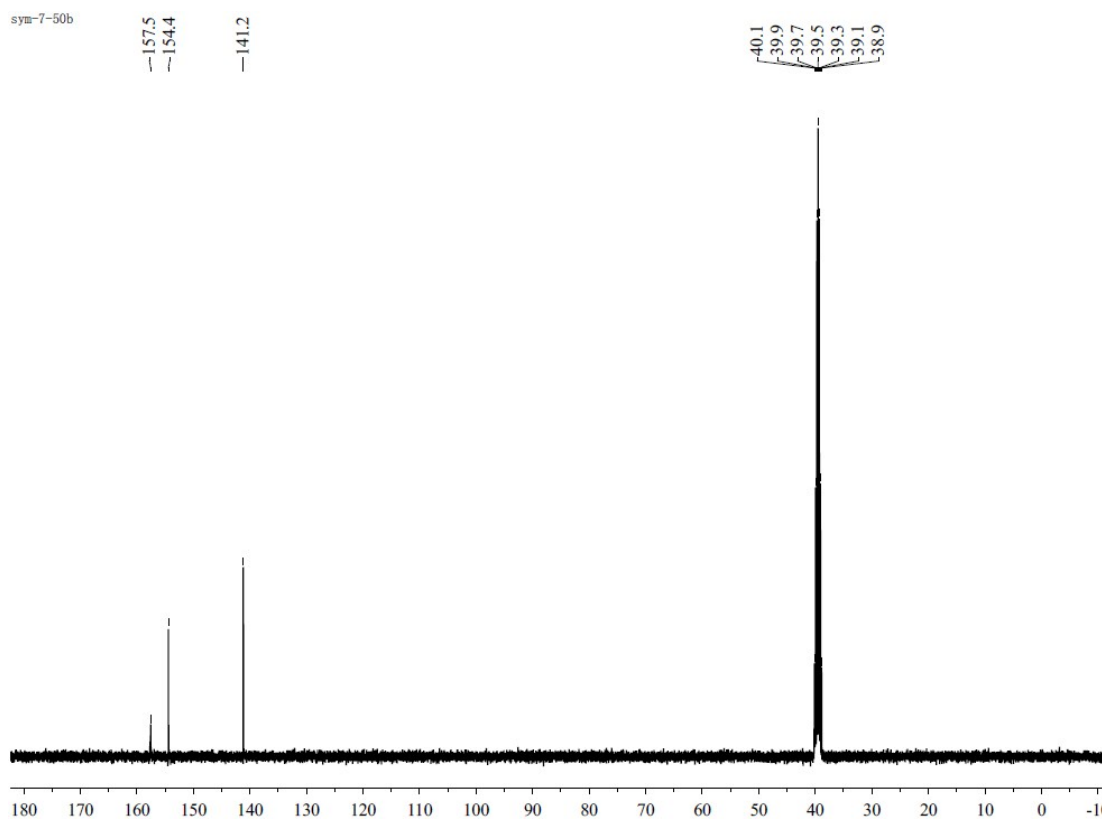

Figure S4.  $^{13}\text{C}$  NMR spectrum of dihydrazinium BNOA (7)

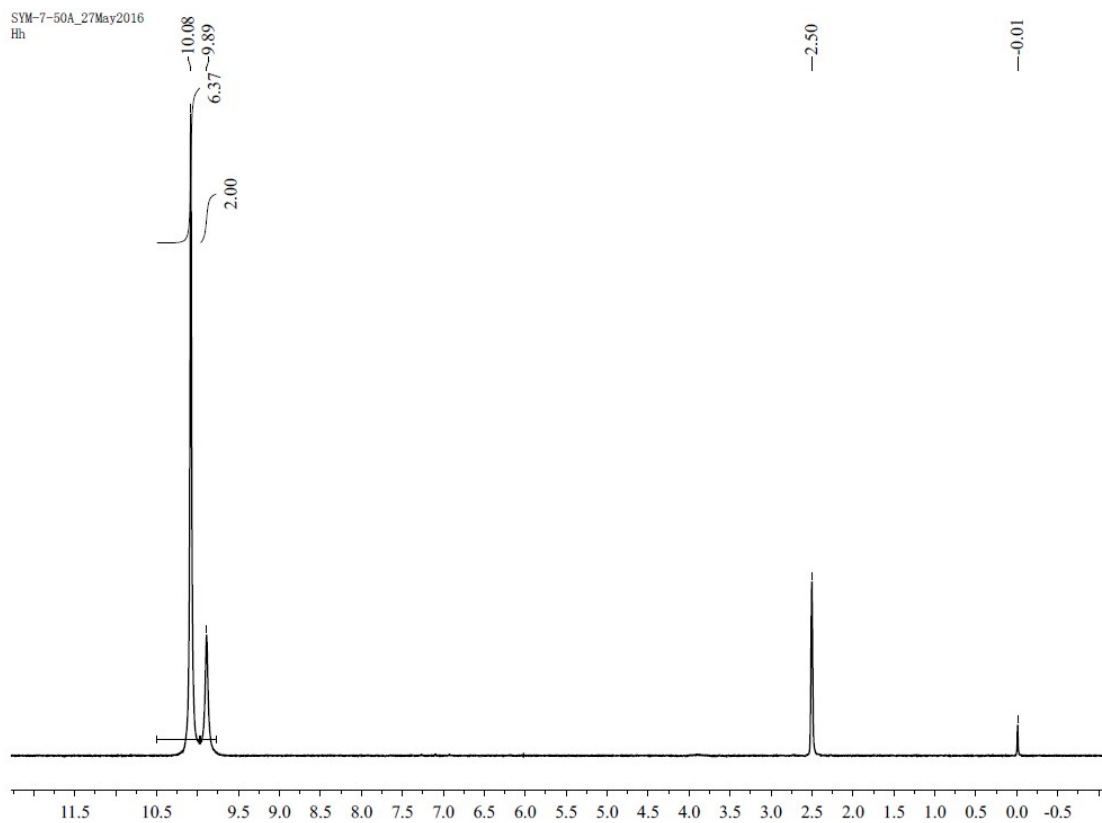

Figure S5.  $^1\text{H}$  NMR spectrum of dihydroxylammonium BNOA (**8**)

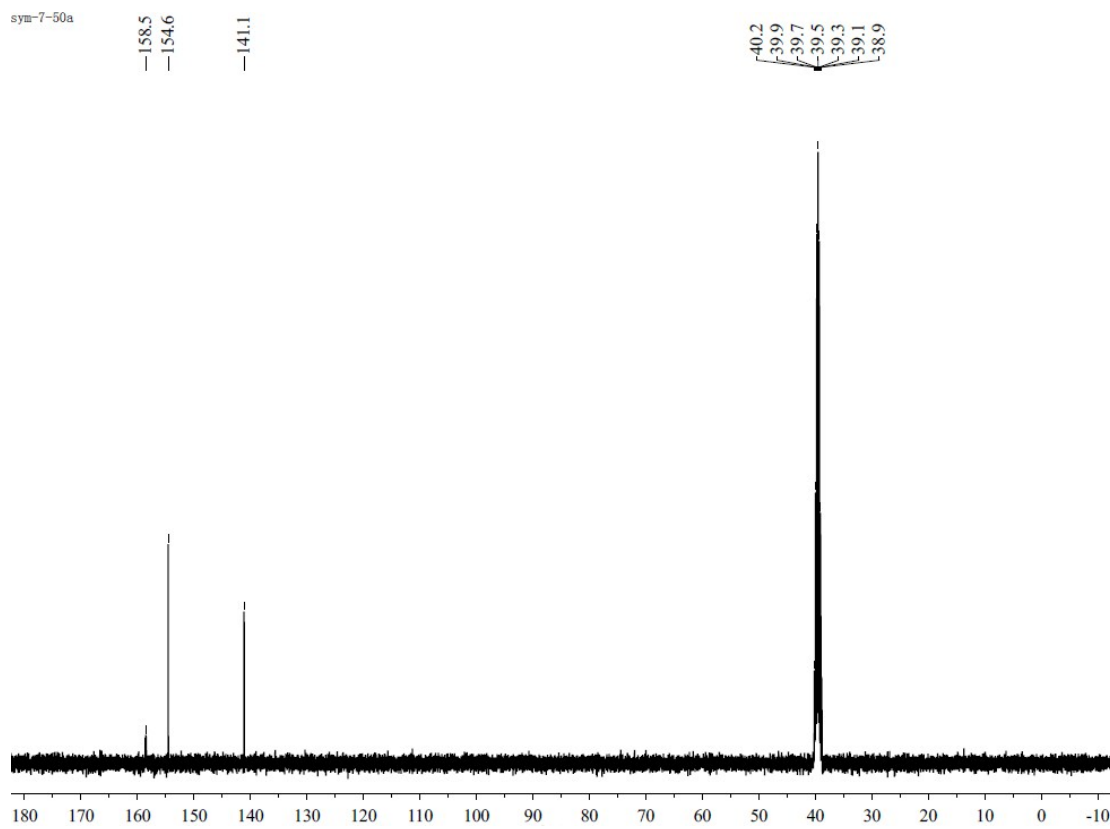

Figure S6.  $^{13}\text{C}$  NMR spectrum of dihydroxylammonium BNOA (**8**)

SYM-7-50D\_27May2016  
Hh

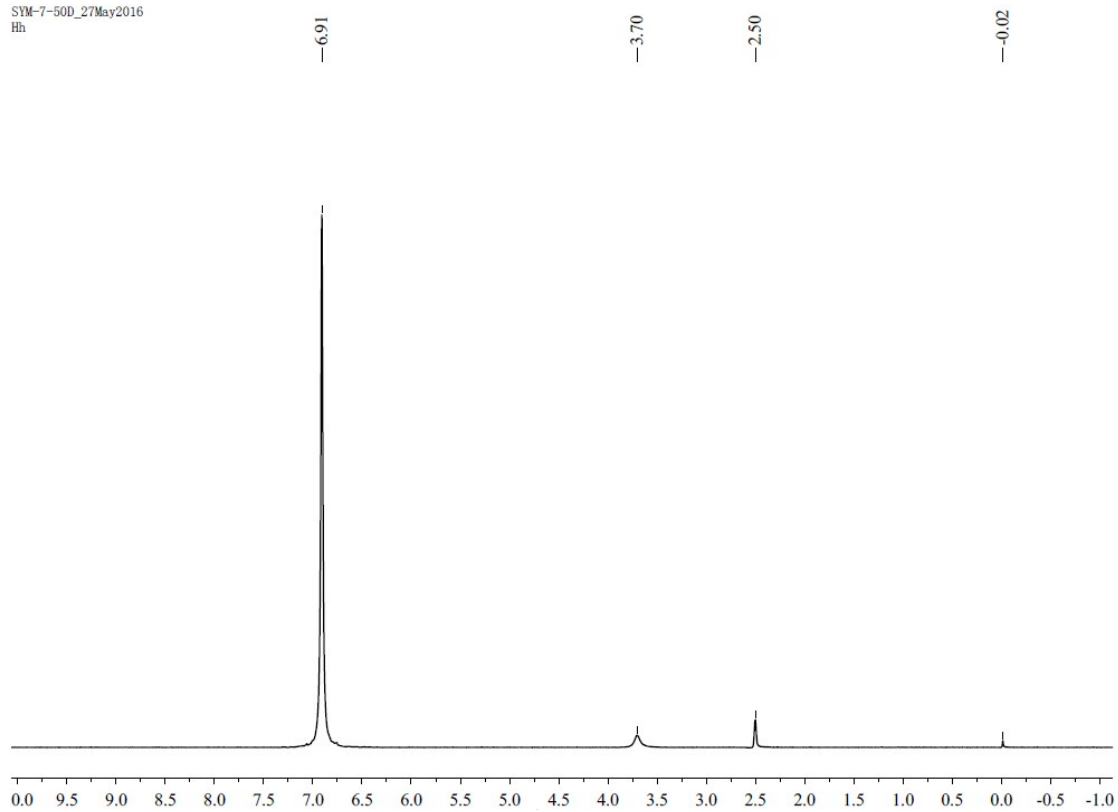

Figure S7. <sup>1</sup>H NMR spectrum of bis(guanidinium) BNOA (**9**)

sym7-50d

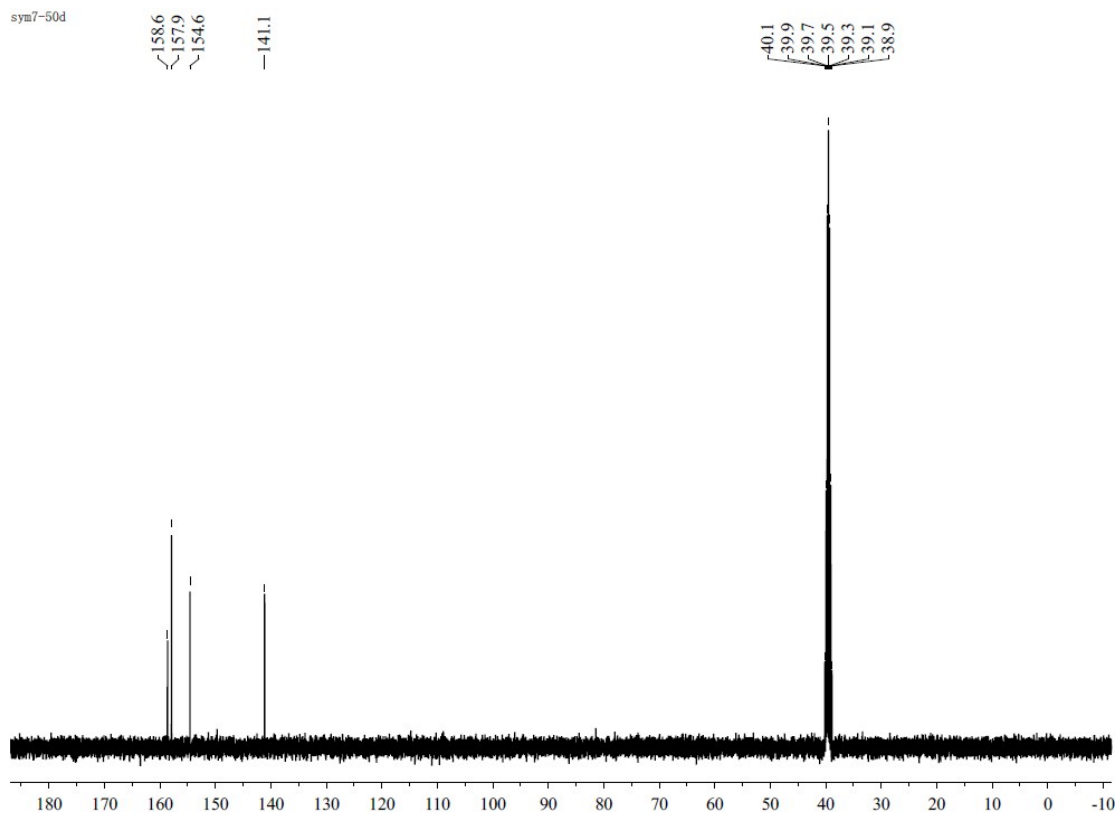

Figure S8. <sup>13</sup>C NMR spectrum of bis(guanidinium) BNOA (**9**)

SYM-7-51A\_27May2016  
Hh

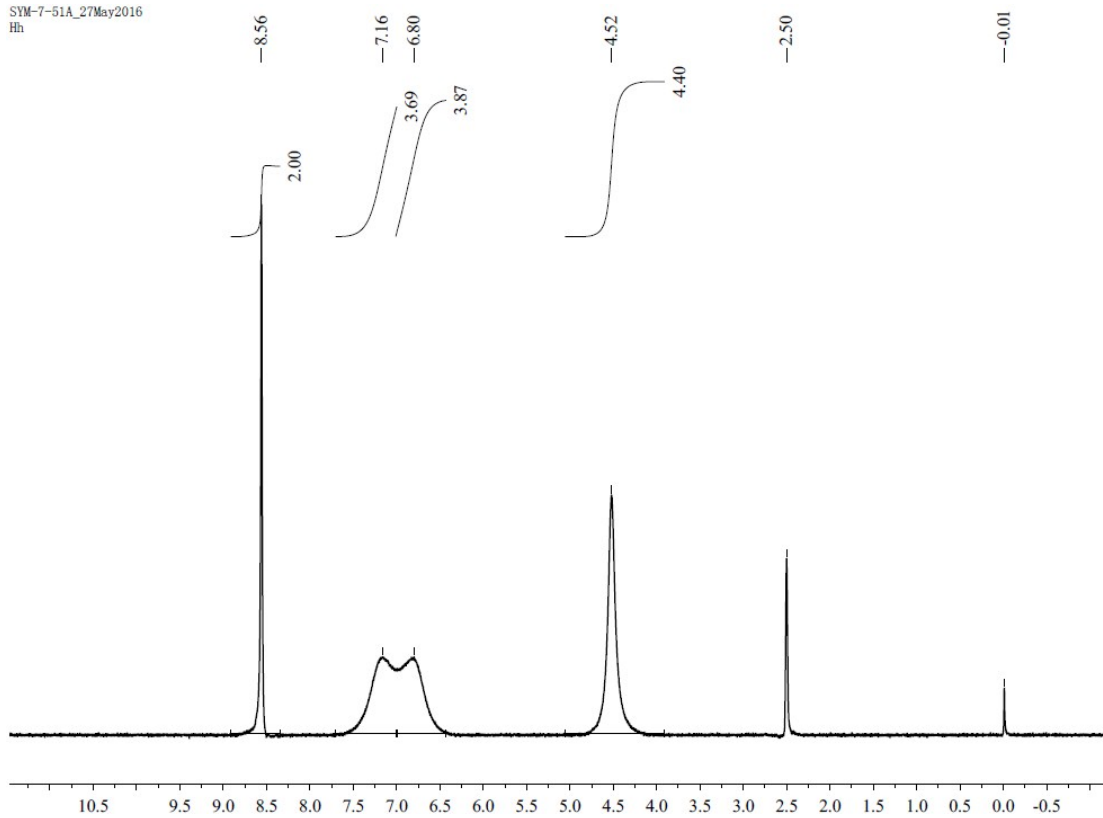

Figure S9. <sup>1</sup>H NMR spectrum of bis(aminoguanidinium) BNOA (**10**)

sym7-51a

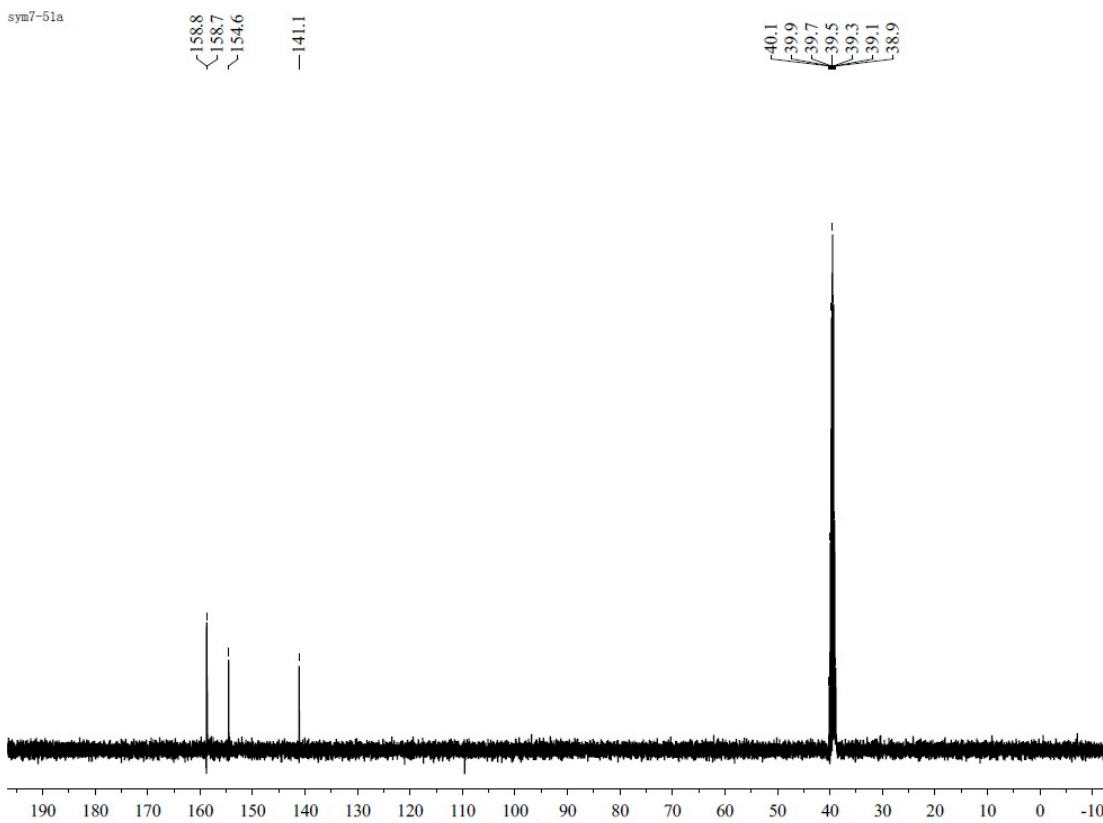

Figure S10. <sup>13</sup>C NMR spectrum of bis(aminoguanidinium) BNOA (**10**)

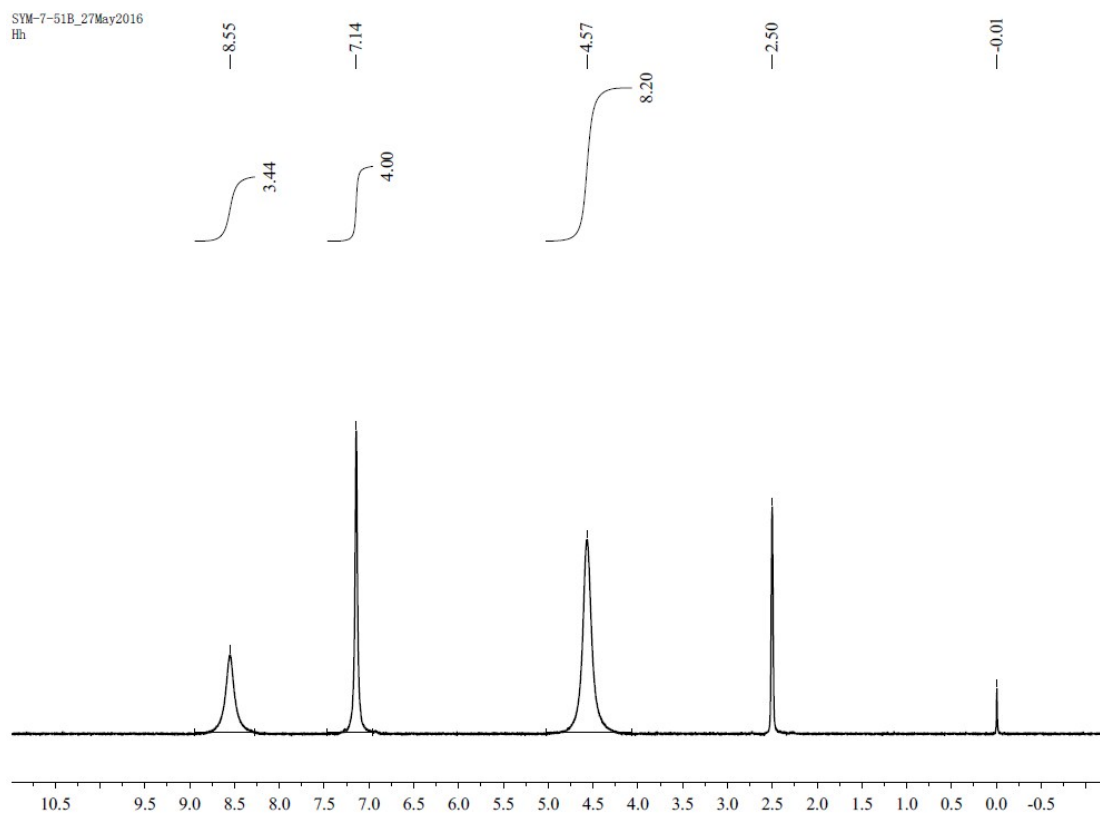

Figure S11.  $^1\text{H}$  NMR spectrum of bis(diaminoguanidinium) BNOA (**11**)

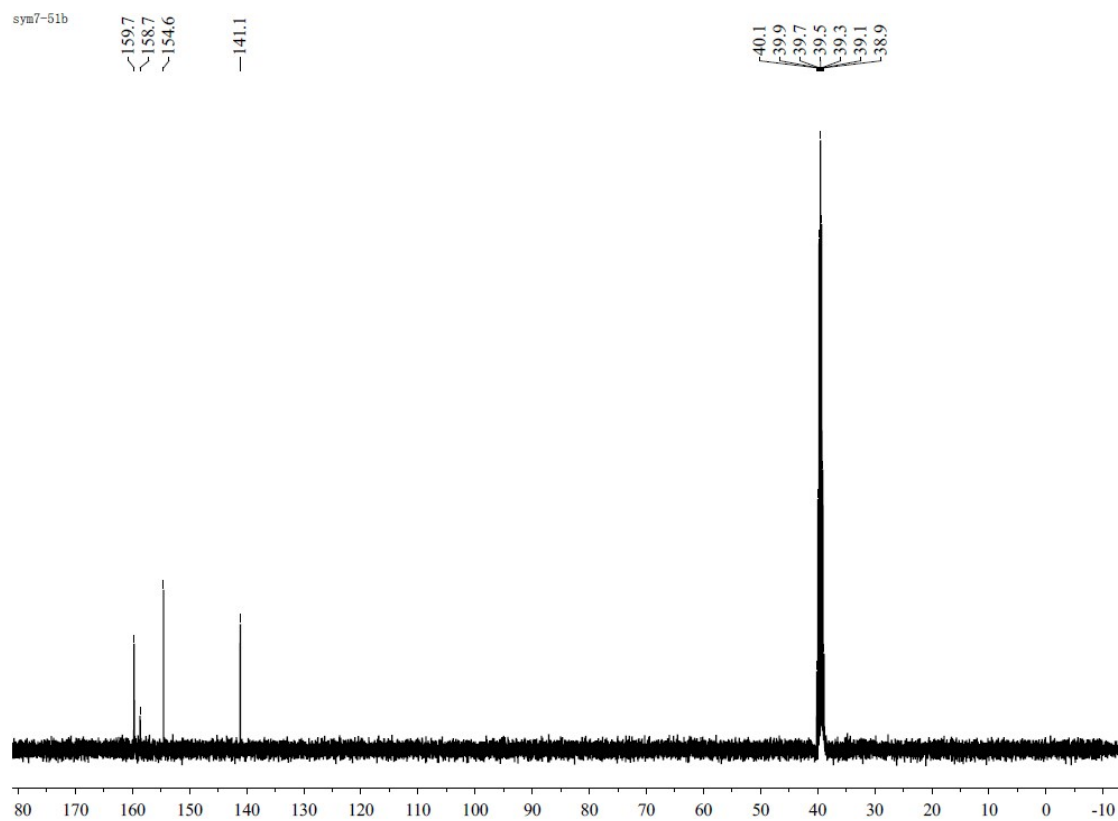

Figure S12.  $^{13}\text{C}$  NMR spectrum of bis(diaminoguanidinium) BNOA (**11**)

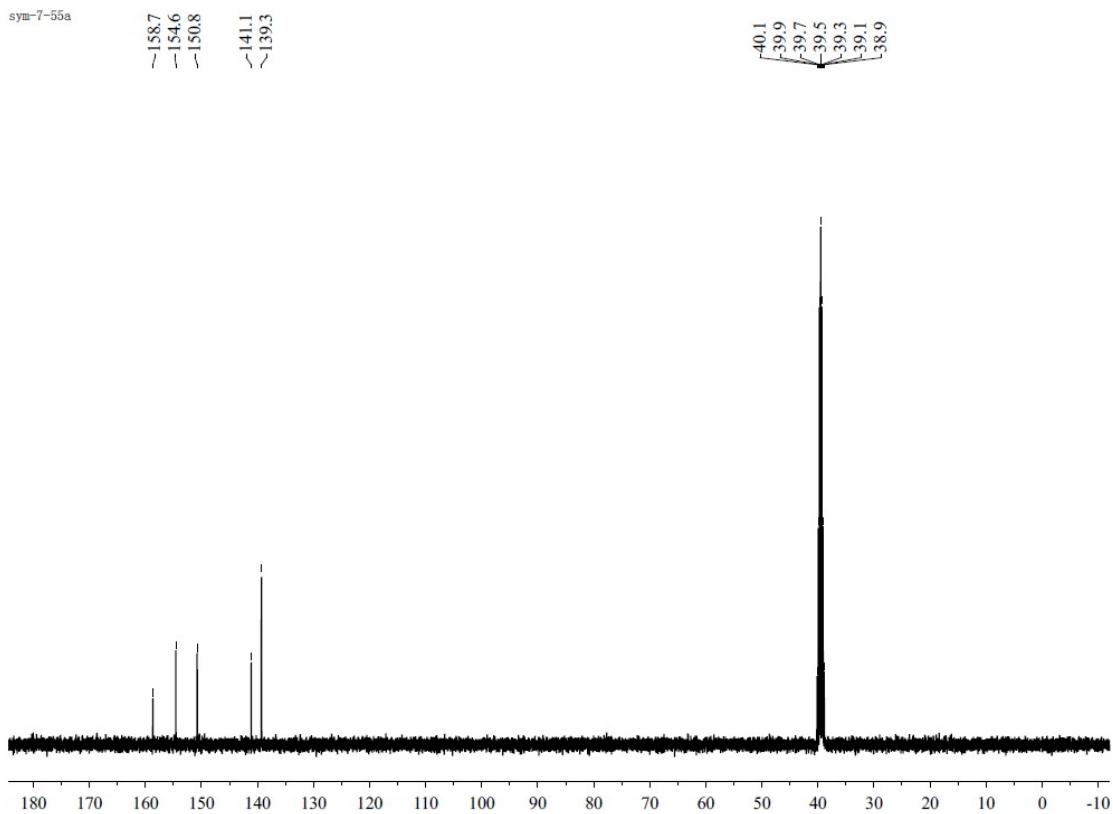

Figure S13.  $^1\text{H}$  NMR spectrum of bis(3-amino-1,2,4-triazolium) BNOA (**12**)

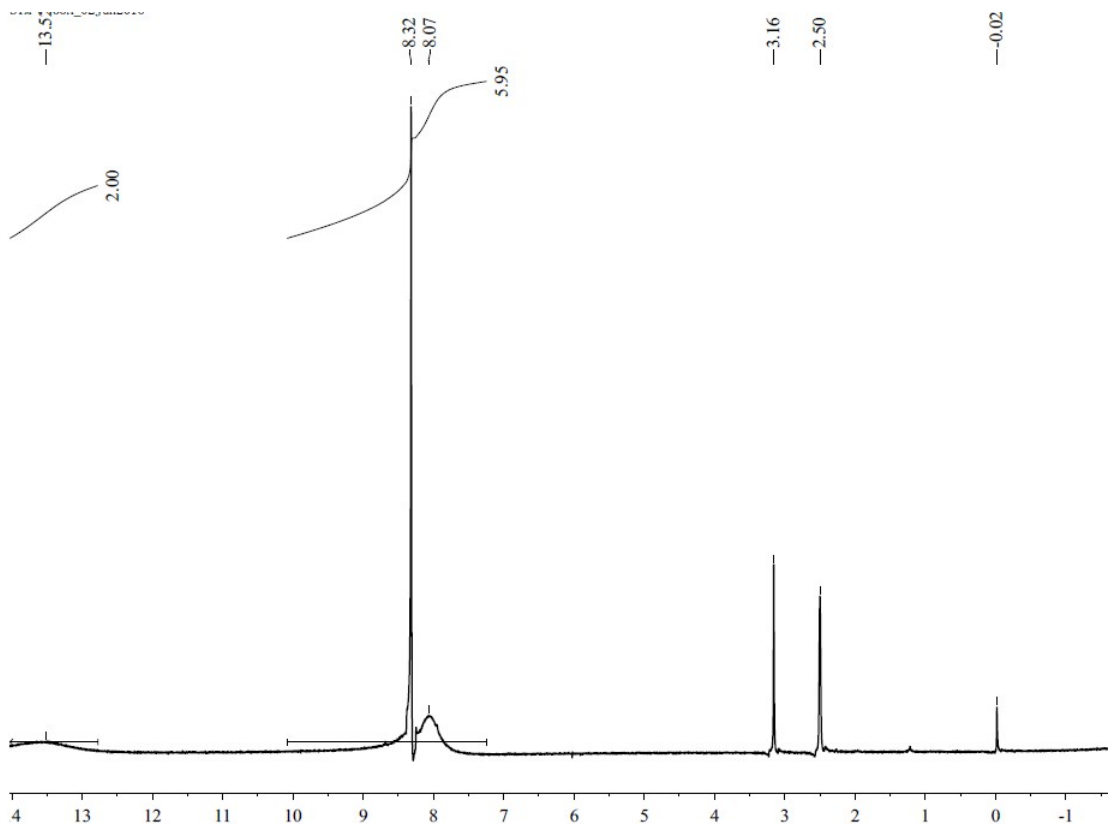

Figure S14.  $^{13}\text{C}$  NMR spectrum of bis(3-amino-1,2,4-triazolium) BNOA (**12**)

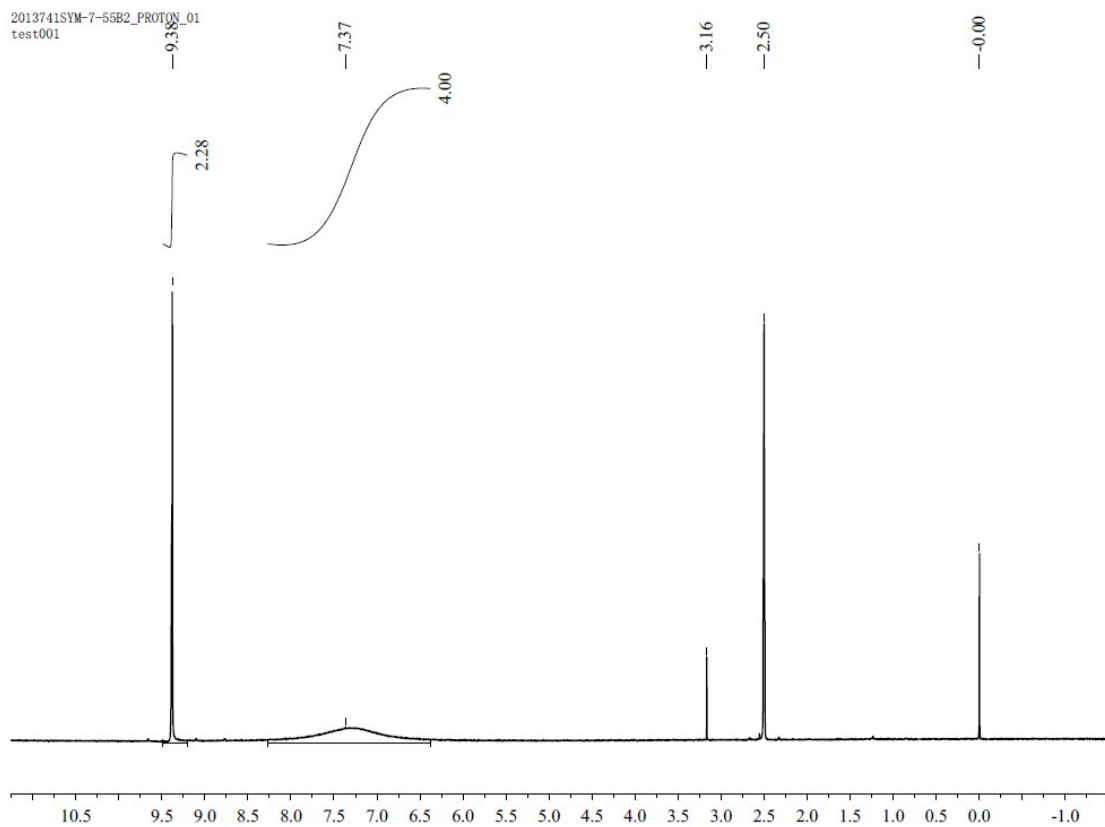

Figure S15.  $^1\text{H}$  NMR spectrum of bis(4-amino-1,2,4-triazolium) BNOA (**13**)

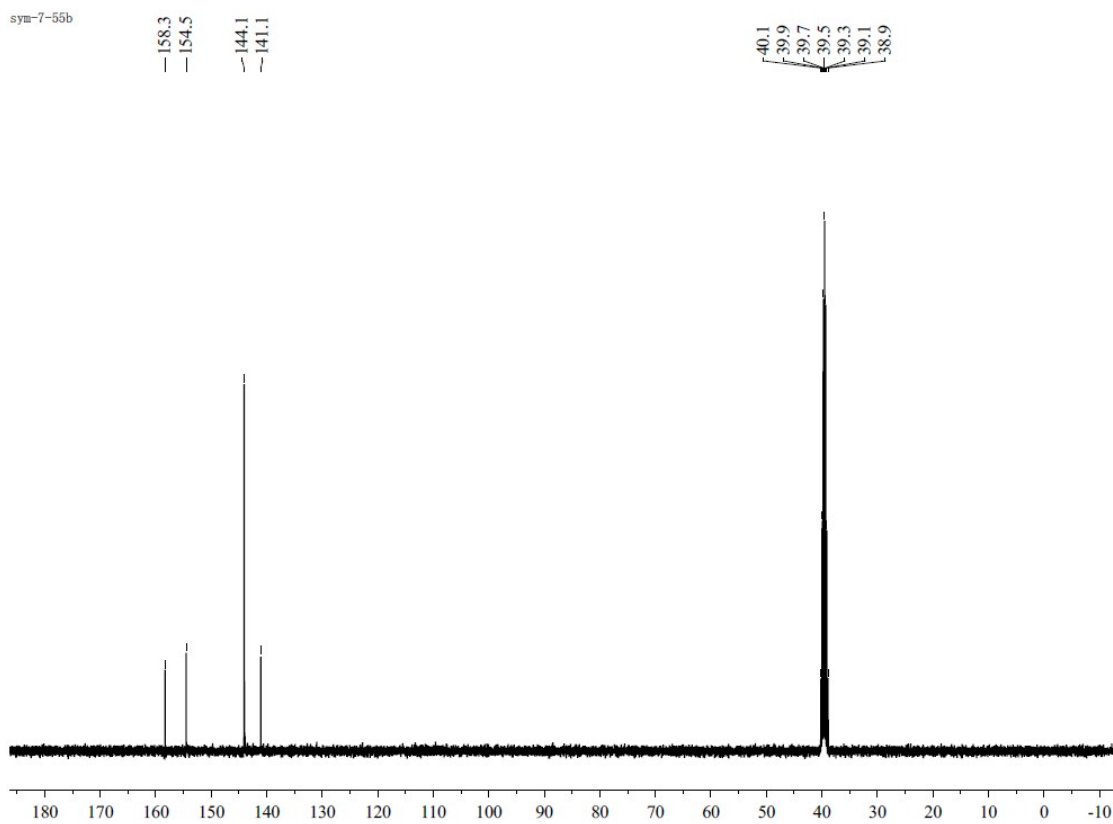

Figure S16.  $^{13}\text{C}$  NMR spectrum of bis(4-amino-1,2,4-triazolium) BNOA (**13**)

## 2. Crystallographic data

Table S1 Crystallographic data and structure refinement parameters for **5**, **7**, **8** and **13**<sup>[a]</sup>.



|                                                                 | <b>5</b>                                                     | <b>6</b>                                                      | <b>8</b>                                                      | <b>13</b>                                                     |
|-----------------------------------------------------------------|--------------------------------------------------------------|---------------------------------------------------------------|---------------------------------------------------------------|---------------------------------------------------------------|
| CCDC number                                                     | 1495666                                                      | 1495667                                                       | 1495668                                                       | 1495669                                                       |
| Empirical formula                                               | C <sub>6</sub> H <sub>2</sub> N <sub>10</sub> O <sub>8</sub> | C <sub>6</sub> H <sub>10</sub> N <sub>12</sub> O <sub>9</sub> | C <sub>6</sub> H <sub>8</sub> N <sub>12</sub> O <sub>10</sub> | C <sub>10</sub> H <sub>10</sub> N <sub>8</sub> O <sub>3</sub> |
| <i>M</i> <sub>w</sub>                                           | 342.18                                                       | 394.26                                                        | 408.24                                                        | 510.36                                                        |
| Crystal system                                                  | Trigonal                                                     | Triclinic                                                     | Monoclinic                                                    | Monoclinic                                                    |
| Space group                                                     | R-3:H                                                        | P-1                                                           | P1 21/c 1                                                     | P 21/c                                                        |
| <i>a</i> [Å]                                                    | 24.929(3)                                                    | 8.327(3)                                                      | 12.4121(19)                                                   | 8.248(2)                                                      |
| <i>b</i> [Å]                                                    | 24.929(3)                                                    | 8.515(3)                                                      | 4.1853(7)                                                     | 16.509(4)                                                     |
| <i>c</i> [Å]                                                    | 5.2298(9)                                                    | 10.354(3)                                                     | 14.866(2)                                                     | 7.2536(17)                                                    |
| $\alpha$ [°]                                                    | 90                                                           | 85.243(7)                                                     | 90                                                            | 90                                                            |
| $\beta$ [°]                                                     | 90                                                           | 83.980(7)                                                     | 113.460(3)                                                    | 97.398(5)                                                     |
| $\gamma$ [°]                                                    | 120                                                          | 85.302(7)                                                     | 90                                                            | 90                                                            |
| <i>V</i> [Å <sup>3</sup> ]                                      | 2814.7(9)                                                    | 725.6(4)                                                      | 708.5(2)                                                      | 979.5(4)                                                      |
| <i>Z</i>                                                        | 9                                                            | 2                                                             | 2                                                             | 2                                                             |
| <i>T</i> [K]                                                    | 293(2)                                                       | 293(2)                                                        | 130                                                           | 293(2)                                                        |
| $\lambda$ [Å]                                                   | 0.71073                                                      | 0.71073                                                       | 0.71073                                                       | 0.71073                                                       |
| Density[ $\text{mg m}^{-3}$ ]                                   | 1.817                                                        | 1.805                                                         | 1.914                                                         | 1.730                                                         |
| $\mu$ [ $\text{mm}^{-1}$ ]                                      | 0.168                                                        | 0.166                                                         | 0.179                                                         | 0.150                                                         |
| <i>F</i> (000)                                                  | 1548                                                         | 404                                                           | 416                                                           | 520                                                           |
| Crystal size[ $\text{mm}^{-3}$ ]                                | 0.180×0.110×0.0                                              | 0.20×0.14×0.                                                  | 0.15×0.12×0.                                                  | 0.200×0.160×0.1                                               |
| $\theta$ range[°]                                               | 80                                                           | 10                                                            | 05                                                            | 20                                                            |
| Index ranges                                                    | 2.830-24.958                                                 | 1.983-24.997                                                  | 1.789-30.617                                                  | 2.467-25.499                                                  |
|                                                                 | -29≤ <i>h</i> ≤29                                            | -9≤ <i>h</i> ≤9                                               | -17≤ <i>h</i> ≤13                                             | -9≤ <i>h</i> ≤9                                               |
|                                                                 | -29≤ <i>k</i> ≤22                                            | -10≤ <i>k</i> ≤10                                             | -5≤ <i>k</i> ≤5                                               | -20≤ <i>k</i> ≤14                                             |
|                                                                 | -6≤ <i>l</i> ≤6                                              | -12≤ <i>l</i> ≤9                                              | -17≤ <i>l</i> ≤21                                             | -8≤ <i>l</i> ≤8                                               |
| Reflections collected                                           | 5145                                                         | 4026                                                          | 6729                                                          | 5442                                                          |
| Independent reflections                                         | 1091                                                         | 2552                                                          | 2164                                                          | 1821                                                          |
|                                                                 | [ <i>R</i> (int)=0.0416]                                     | [ <i>R</i> (int)=0.0281]                                      | [ <i>R</i> (int)=0.0309]                                      | [ <i>R</i> (int)=0.0320]                                      |
| Data/restraints/parameters                                      | 1091/0/114                                                   | 2552/22/284                                                   | 2164/0/143                                                    | 1821/0/175                                                    |
| GOF                                                             | 1.108                                                        | 1.041                                                         | 1.022                                                         | 1.080                                                         |
| <i>R</i> [ <i>F</i> <sup>2</sup> > 2σ( <i>F</i> <sup>2</sup> )] | 0.0403                                                       | 0.0760                                                        | 0.0396                                                        | 0.0448                                                        |
| <i>wR</i> ( <i>F</i> <sup>2</sup> ) <sup>[b]</sup>              | 0.0971                                                       | 0.2047                                                        | 0.0933                                                        | 0.1085                                                        |

[a] These data can be obtained free of charge from The Cambridge Crystallographic Data Centre via [www.ccdc.cam.ac.uk/data\\_request/cif](http://www.ccdc.cam.ac.uk/data_request/cif).

### 3 Ab Initio computational data

Table S2 Ab Initio computational data.

| Compounds                                                                           | <i>E</i> <sub>0</sub><br>(Hartree) | ZPE<br>(Hartree) | <i>H</i> <sub>T</sub><br>(Hartree) | HOF<br>(kJ/mol)       |
|-------------------------------------------------------------------------------------|------------------------------------|------------------|------------------------------------|-----------------------|
|  | -261.532452                        | 0.045697         | 0.004418                           | 196.75 <sup>[1]</sup> |
| CH <sub>4</sub>                                                                     | -40.3984857                        | 0.044793         | 0.003812                           | -74.6 <sup>[2]</sup>  |
| NH <sub>3</sub>                                                                     | -56.4341763                        | 0.034372         | 0.003818                           | -45.9 <sup>[2]</sup>  |
| CH <sub>3</sub> NH <sub>2</sub>                                                     | -95.6318759                        | 0.064032         | 0.004369                           | -23.0 <sup>[2]</sup>  |
| NH <sub>2</sub> NO <sub>2</sub>                                                     | -260.5478787                       | 0.039257         | 0.003356                           | -6.1 <sup>[3]</sup>   |
|  | -336.5623427                       | 0.048881         | 0.004895                           | 163.5                 |
| CH <sub>3</sub> CH <sub>3</sub>                                                     | -79.6068548                        | 0.00443          | 0.070179                           | -84.68 <sup>[4]</sup> |

|                                                                                   |               |          |          |       |
|-----------------------------------------------------------------------------------|---------------|----------|----------|-------|
| 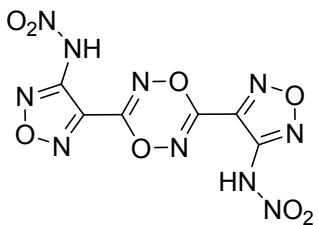 | -1376.0491004 | 0.139621 | 0.020139 | 592.2 |
|  | -1374.9582833 | 0.112786 | 0.01964  | 324.3 |

<sup>a</sup> Total energy ( $E_0$ ) calculated by B3LYP/6-31+G\*\*/MP2/6-311++G\*\* method (Hartree/Particle);

<sup>b</sup> Zero-point correction (ZPE) (Hartree/Particle); <sup>c</sup> Values of thermal correction ( $H_T$ )

(Hartree/Particle); <sup>d</sup> Heat of formation (HOT) (kJ/mol).

Calculations were carried out by using the Gaussian 09 (Revision E.01) suite of programs.<sup>[4]</sup> The geometric optimization of the structures and frequency analyses were carried out by using the B3LYP functional with the 6-31+G\*\* basis set, and single-point energies were calculated at the MP2(full)/6-311++G\*\* level. All of the optimized structures were characterized to be true local energy minima on the potential-energy surface without imaginary frequencies.

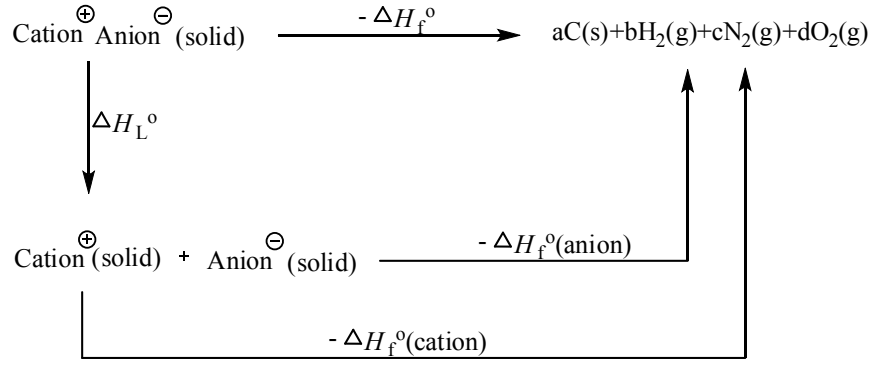

Figure S15. Born-Haber cycle for the formation for energetic salts

Based on the Born-Haber energy cycle (Figure 5), the heat of formation of a salt can be simplified according to Equation (1), where  $\Delta H_L$  is the lattice energy of the salt.

$$\Delta H_f^{\circ}(\text{ionic salt, 298K}) = \Delta H_f^{\circ}(\text{cation, 298K}) + \Delta H_f^{\circ}(\text{anion, 298K}) - \Delta H_L \quad (1)$$

The  $\Delta H_L$  value could be predicted by the formula suggested by Jenkins et al [Eq. (2)],<sup>[5]</sup> where  $U_{\text{POT}}$  is the lattice potential energy and  $nM$  and  $nX$  depend on the nature of the ions  $M^{p+}$  and  $X^{q-}$ , respectively, and are equal to three for monoatomic ions, five for linear polyatomic ions, and six for nonlinear polyatomic ions.

$$\Delta H_L = U_{\text{POT}} + [p(n_M/2-2) + q(n_X/2-2)]RT \quad (2)$$

The equation for the lattice potential energy,  $U_{\text{POT}}$ , takes the form of Equation (3), where  $\rho_m$  is the density ( $\text{g cm}^{-3}$ ),  $M_m$  is the chemical formula mass of the ionic material ( $\text{g}$ ), and the coefficients  $\gamma$  ( $\text{kJ}^{-1}\text{mol}^{-1}\text{cm}$ ) and  $\delta$  ( $\text{kJ}^{-1}\text{mol}^{-1}$ ) are assigned literature values.<sup>[5]</sup>

$$U_{\text{POT}}(\text{kJ}^{-1}\text{mol}^{-1}) = \gamma (\rho_m/M_m)^{1/3} + \delta \quad (3)$$

#### 4 Detonation performances calculation

Detonation pressure ( $P$ ) and detonation velocity ( $D$ ) were calculation according to the Kamlet-Jacobs

equations<sup>[5]</sup>.

$$D = 1.01(N \bar{M}^{1/2} Q^{1/2})^{1/2}(1 + 1.30\rho) \quad (4)$$

$$P = 1.558\rho^2 \bar{M}^{1/2} Q^{1/2} \quad (5)$$

where each term in eqs 4 and 5 is defined as follows:  $D$ , the detonation velocity ( $\text{km s}^{-1}$ );  $P$ , the detonation pressure (GPa);  $N$ , the moles of detonation gases per gram explosive;  $\bar{M}$ , the average molecular weight of these gases ( $\text{g mol}^{-1}$ );  $Q$ , the heat of detonation ( $\text{J g}^{-1}$ ); and  $\rho$ , the loaded density of explosives ( $\text{g cm}^{-3}$ ). The measured density was used for the calculation here.

- 
- 1 Wang R, Guo Y, Zeng Z, et al. *Chem. Eur. J.*, 2009, 15, 2625-2634.
  - 2 *Eur. J. Inorg. Chem.*, 2008, 2560-2568.
  - 3 Wang K, Parrish D A, Shreeve J M. *Chem. Eur. J.*, 2011, 17, 14485-14492.
  - 4 *New J. Chem.*, 2008, 32, 317-322.
  - 5 (a) M. J. Kamlet, S. J. Jacobs, *J. Chem. Phys.* **1968**, 48, 23-35; (b) M. J. Kamlet, J. E. Ablard, *J. Chem. Phys.* **1968**, 48, 36-42; (c) M. J. Kamlet, C. Dicknison, *J. Chem. Phys.* **1968**, 48, 43-49. (d) H. Gao, C. Ye, C. Piekarski, J. M. Shreeve, *J. Phys. Chem. C* **2007**, 111, 10718-10731.
